# Supplementary material for: Zinc(ii), cobalt(ii) and manganese(ii) networks with phosphoserine ligand: synthesis, crystal structures and magnetic and proton conductivity properties
Source: Royal Society of Chemistry journal article supplement (doi:10.1039/c7dt03474a), 2017-01-01
Supplement: c7dt03474a1.pdf [file c7dt03474a1.pdf]

## SUPPORTING INFORMATION

# Zinc(II), cobalt(II) and manganese(II) networks with phosphoserine ligand: Synthesis, crystal structures magnetic and proton conductivity properties

*Julia Vallejo,<sup>1</sup> Inés R. Salcedo,<sup>2</sup> Rosario M. P. Colodrero,<sup>2</sup> Aurelio Cabeza,<sup>2</sup> Anna Świtlicka,<sup>3</sup> Joan Cano,<sup>1</sup> and Marta Viciano-Chumillas<sup>1,\*</sup>*

<sup>1</sup>Institut de Ciència Molecular (ICMol), Universitat de València, 46980 Paterna, València

<sup>2</sup>Departamento de Química Inorgánica, Cristalografía y Mineralogía, Universidad de Málaga, Campus de Teatinos s/n, Málaga-29071, Spain

<sup>3</sup>Department of Crystallography, Institute of Chemistry, University of Silesia, 9th Szkolna St., 40-006 Katowice, Poland

## LIST OF CONTENTS

**Figure S1.** Rietveld plot for **4**.

**Figure S2.** Simulated and experimental X-ray powder diffraction patterns for compounds **1–3**.

**Figure S3.** Tetrahedral coordination of M<sup>2+</sup> (Zn and Co) and connectivity of phosphoserine ligand in the crystal structures of **1** and **2**.

**Figure S4.** Hydrogen bonding in compound [Zn(Pser)]<sub>n</sub> (**1**).

**Figure S5.** Hydrogen bonding in compound [Co(Pser)(H<sub>2</sub>O)<sub>2</sub>]<sub>n</sub> (**3**).

**Figure S6.** Thermogravimetric analyses of compounds **1–4**.

**Figure S7.** X-ray powder diffraction patterns for compounds **2** as synthesized and after exposure at 80 °C and RH 95%, and for **3**.

**Figure S8.** Thermogravimetric analysis of **2** as synthesized and after exposure at 80 °C and RH 95%.

**Figure S9.** Plot of complex impedance plane for **1**, **2** and **4** at 95% of RH and in the 25–80°C temperature range.

**Figure S10.** Plot of the magnetization vs magnetic field in the 0–5 T range at 2 K for compounds **2–4**.

**Figure S11.** Representation of the magnetic network for compound **3**.

**Figure S12.** Representation of the magnetic network for compound **4**.

## FIGURES

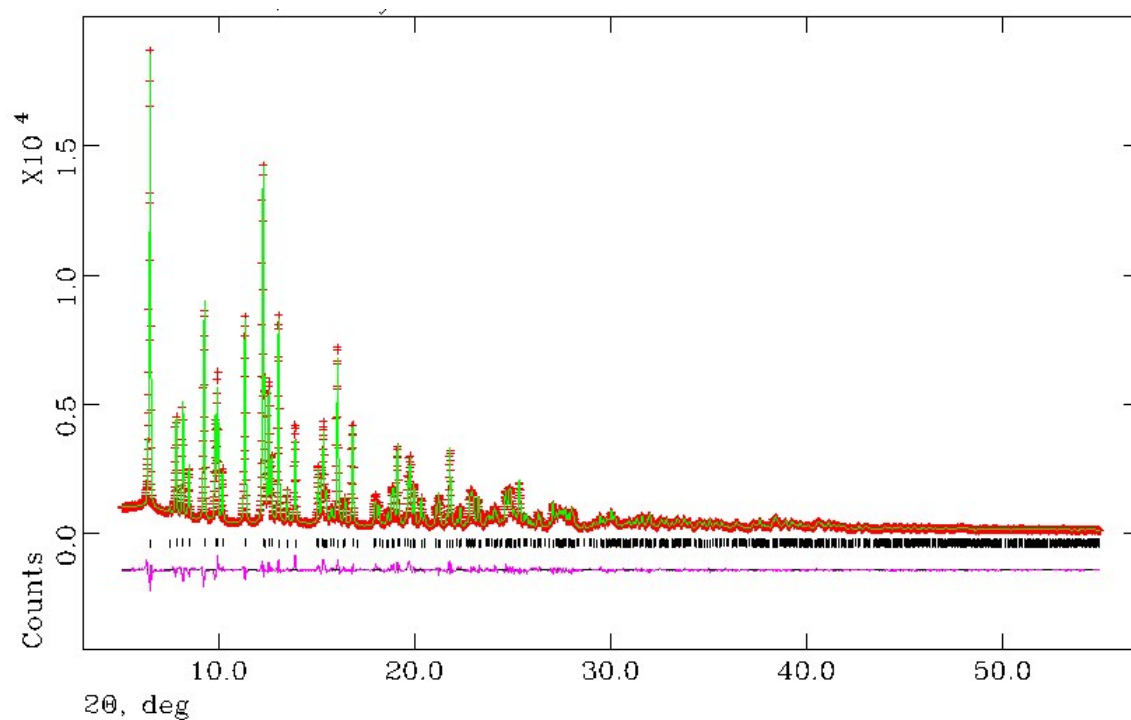

**Figure S1.** Rietveld plot for  $[\text{Mn}(\text{Pser})(\text{H}_2\text{O})]_n$  (**4**) (Mo  $\text{K}_{\alpha 1}$  radiation).

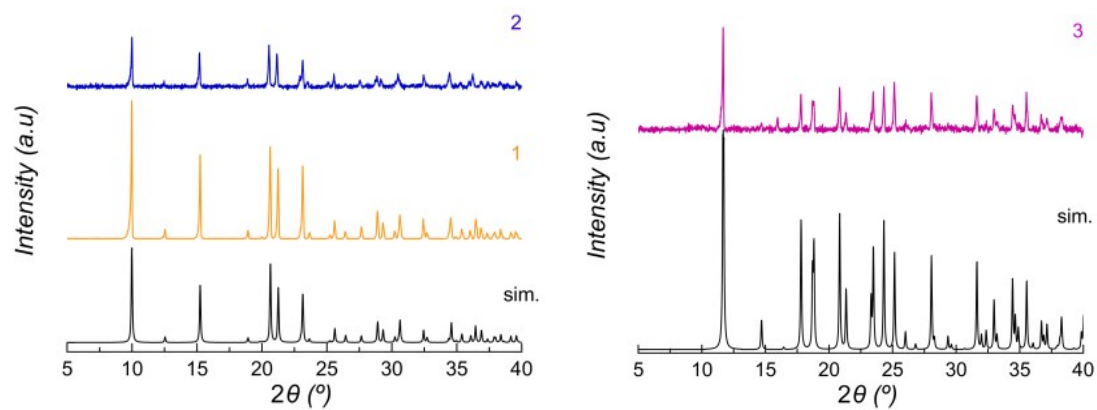

**Figure S2.** Simulated (black) and experimental X-ray powder diffraction patterns for compounds **1** (orange), **2** (blue) and **3** (magenta).

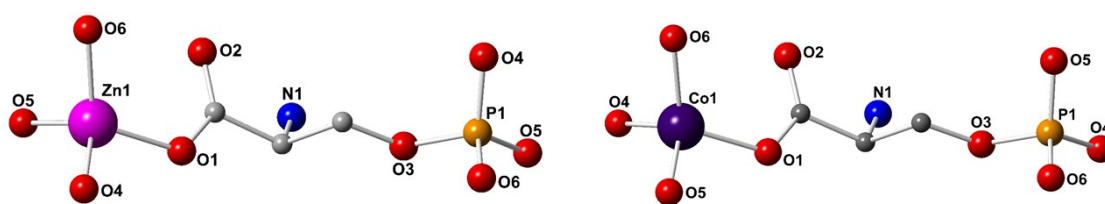

**Figure S3.** Tetrahedral coordination of  $M^{2+}$  (Zn and Co) and the connectivity of phosphoserine ligand in the crystal structures of  $[Zn(HPser)]_n$  (**1**) (left) and  $[Co(HPser)]_n$  (**2**) (right). Hydrogen atoms are omitted for clarity. Colour code: magenta, zinc; violet, cobalt; orange, phosphorous; blue, nitrogen; red, oxygen; grey, carbon.

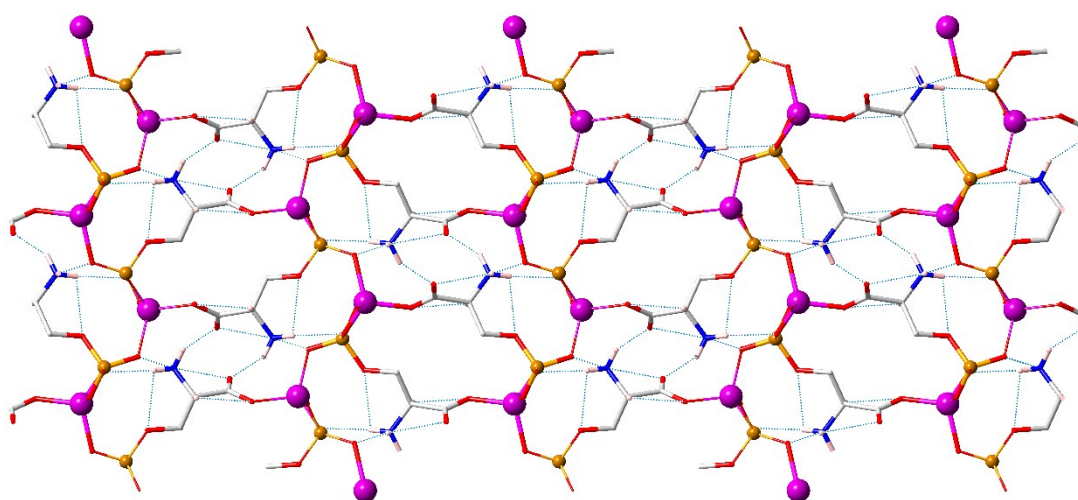

**Figure S4.** View of the hydrogen bonding in the *a*-axis direction in compound  $[Zn(HPser)]_n$  (**1**). Hydrogen atoms that are not involved in hydrogen bonds are omitted for clarity. Colour code: magenta, zinc; orange, phosphorous; blue, nitrogen; red, oxygen; grey, carbon.

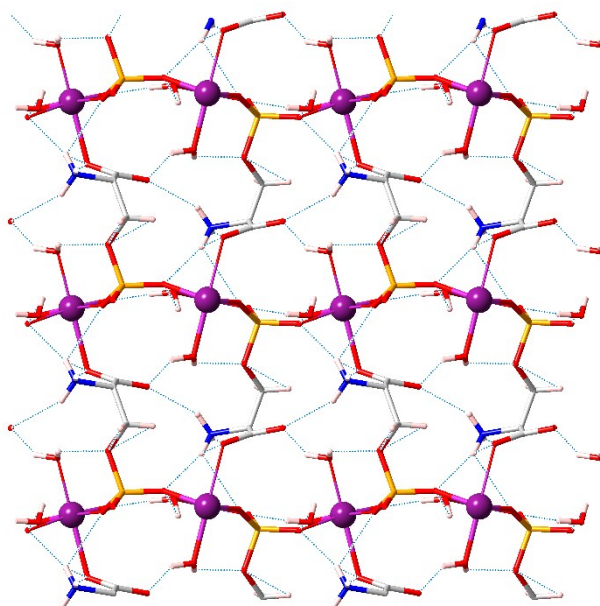

**Figure S5.** View of the hydrogen bonding in the *a*-axis direction of compound  $[\text{Co}(\text{HPser})(\text{H}_2\text{O})_2]_n$  (**3**). Hydrogen atoms that are not involved in hydrogen bonds are omitted for clarity. Colour code: magenta, cobalt; yellow, phosphorous; blue, nitrogen; red, oxygen; grey, carbon; pink, hydrogen.

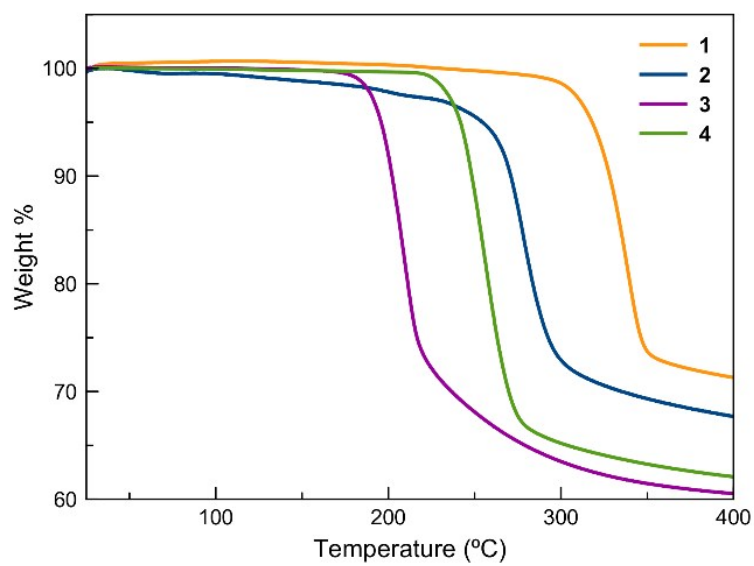

**Figure S6.** Thermogravimetric analyses of compounds **1–4**.

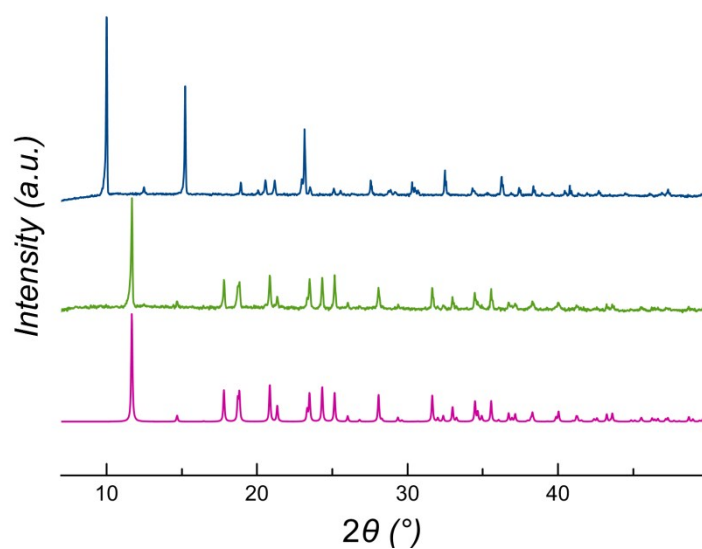

**Figure S7.** X-ray powder diffraction patterns for compounds **2** as synthesized (blue line), after exposure at 80 °C and RH 95% (green line) and for **3** (magenta line).

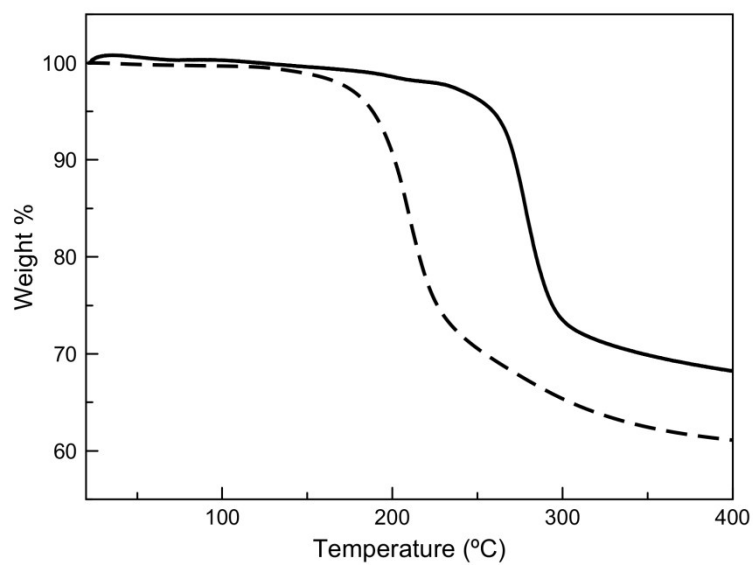

**Figure S8.** Thermogravimetric analysis of **2** as synthesized (black line) and after exposure at 80 °C and RH 95% (dash line).

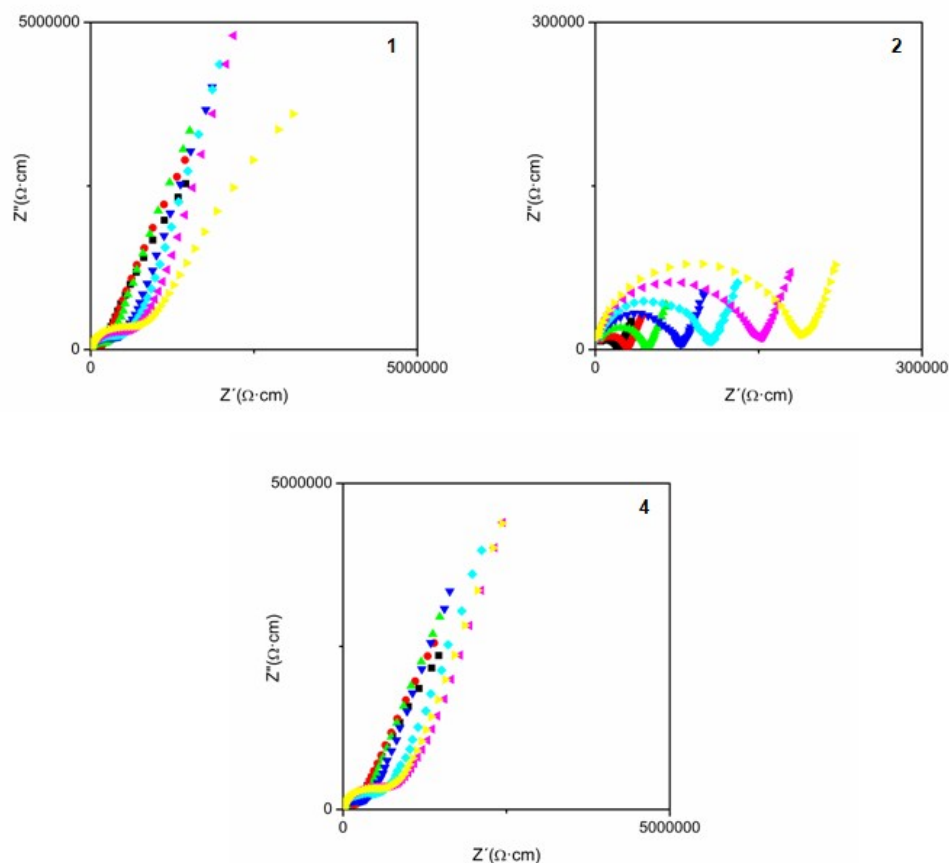

**Figure S9.** Plot of complex impedance plane for  $[\text{Zn}(\text{HPser})]_n$  (1),  $[\text{Co}(\text{HPser})]_n$  (2) and  $[\text{Mn}(\text{HPser})(\text{H}_2\text{O})]_n$  (4). All compounds were measured at 95% of RH and at seven temperatures, 80 (black), 70 (red), 60 (green), 50 (blue), 40 (light blue), 30 (magenta) and 25 °C (yellow).

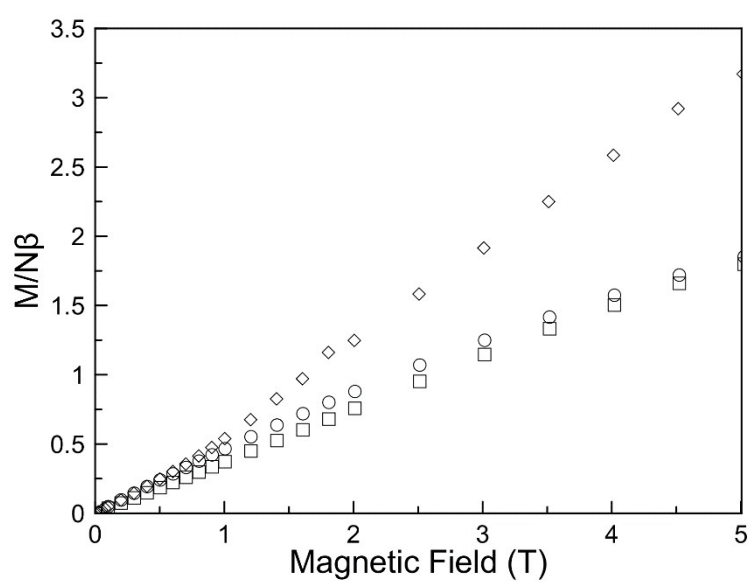

**Figure S10.** Plot of the magnetization vs magnetic field in the 0–5 T range at 2 K for compounds 2 (○), 3 (□), and 4 (\*).

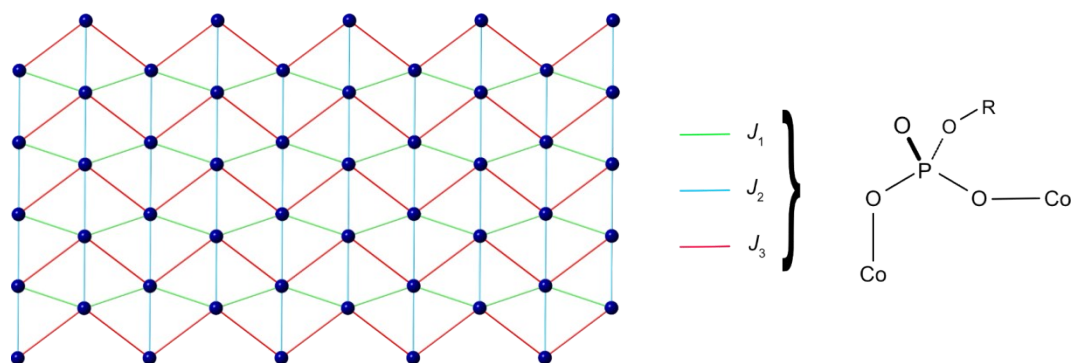

**Figure S11.** Representation of the magnetic network for compound **3** where the cobalt(II) ions are the blue balls and the magnetic exchange couplings are represented by colour lines (see Table 4).

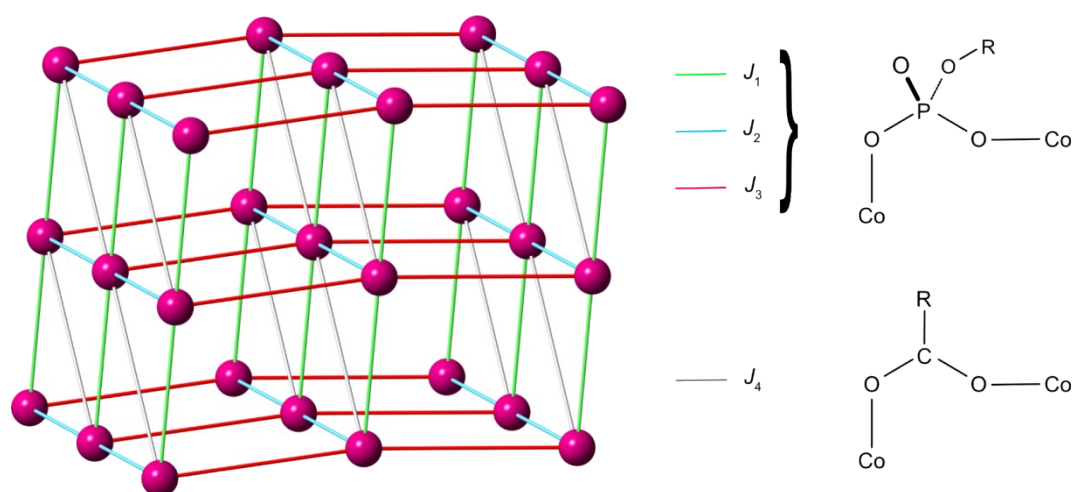

**Figure S12.** Representation of the magnetic network for compound **4** where the manganese(II) ions are the magenta balls and the magnetic exchange couplings are represented by colour lines (see Table 4).
